# Supplementary material for: Effects of the Great East Japan Earthquake and huge tsunami on glycaemic control and blood pressure in patients with diabetes mellitus
Source: PubMed Central journal article supplement — BMJ Open. 2012 Apr 13;2(2):e000830. doi: 10.1136/bmjopen-2012-000830 (PMC3332258; doi:10.1136/bmjopen-2012-000830), 2012-04-13

## Supplementary figure 2 (S2)

About twenty minutes after the earthquake occurred, a massive tsunami, more than 10 meters in height, swept into this area. These photos were shot from a ward on the 4th floor of the Takata Hospital. A gigantic wave came from the eastern side of the seacoast and instantly engulfed the hospital building. Eventually, the hospital was flooded nearly to the roof. Because of this tsunami, hospital staff and inpatients were compelled to evacuate to the rooftop. Some, however, were swallowed by the tsunami, and died.

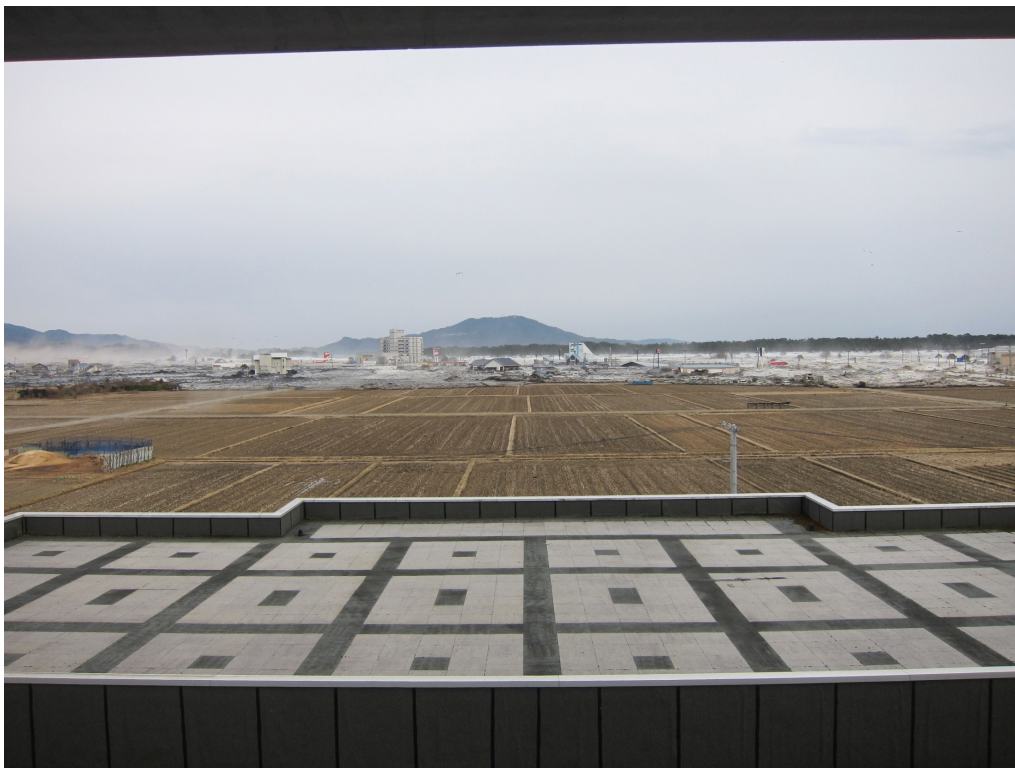

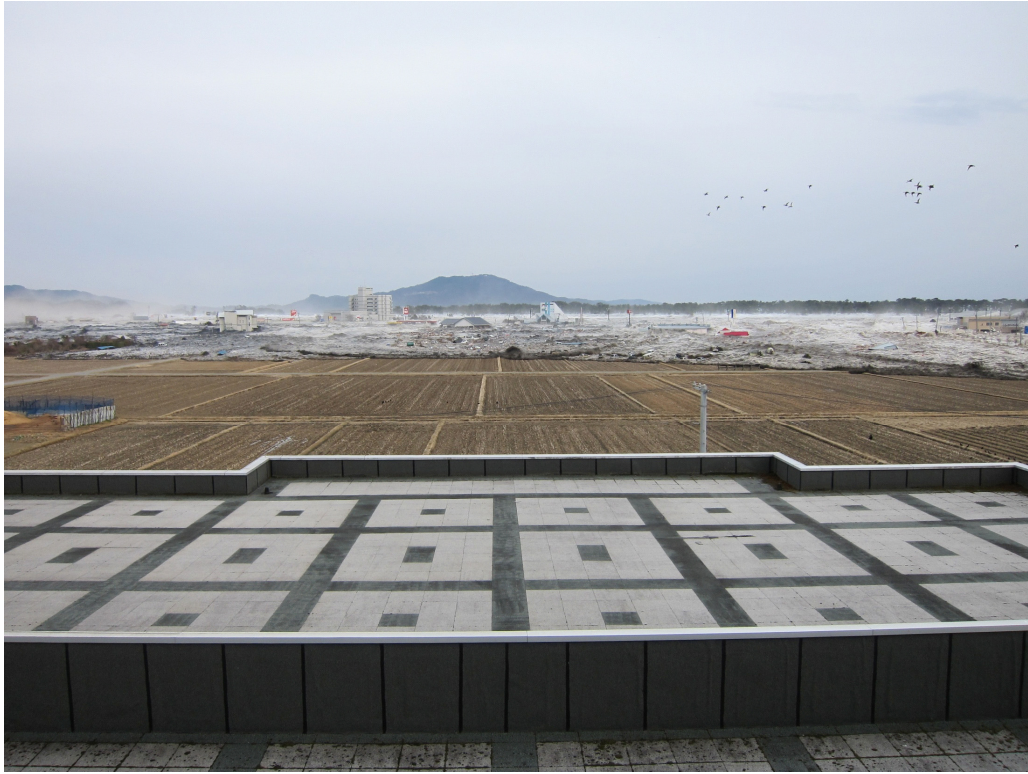

Supplement: bmjopen-2012-000830-s2.pdf [file bmjopen-2012-000830-s2.pdf]
