# Supplementary material for: Effects of the Great East Japan Earthquake and huge tsunami on glycaemic control and blood pressure in patients with diabetes mellitus
Source: PubMed Central journal article supplement — BMJ Open. 2012 Apr 13;2(2):e000830. doi: 10.1136/bmjopen-2012-000830 (PMC3332258; doi:10.1136/bmjopen-2012-000830), 2012-04-13

#### Supplementary figure 4 (S4)

The photo shows the area near the hospital reception desk after the tsunami. Patients' medical information (charts), which had been stored at the back of the reception desk, along with the computers that had stored this information, were all lost. Subsequently, even if a patient came in person to the hospital, it was impossible to confirm which chronic disease the patient had, what treatment he or she had been receiving, or what condition he or she was in. This became a major obstacle to resuming the treatment of patients who had been affected by the tsunami.

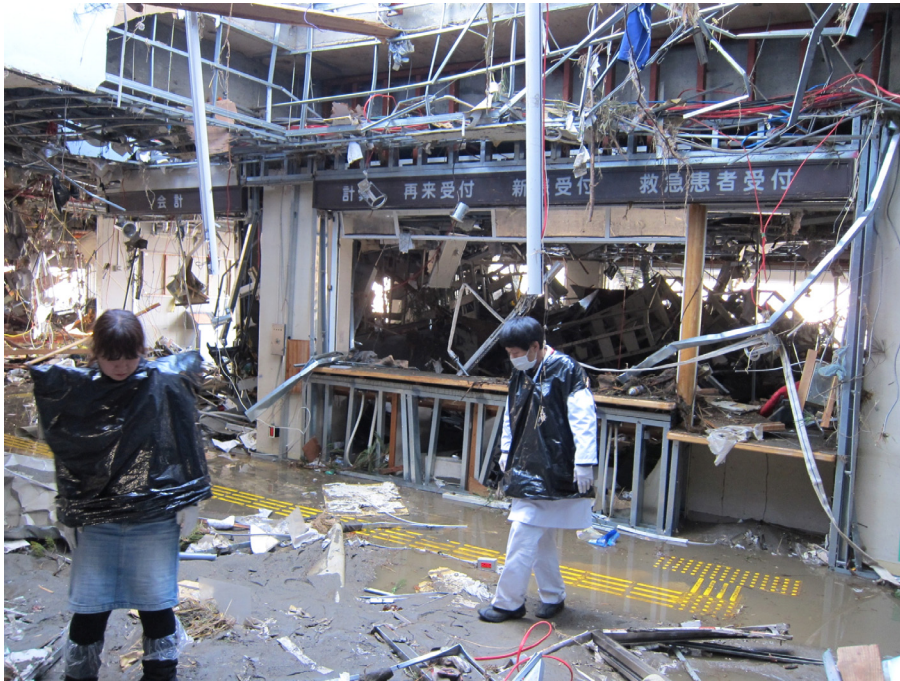

Supplement: bmjopen-2012-000830-s4.pdf [file bmjopen-2012-000830-s4.pdf]
