# Supplementary material for: Effects of the Great East Japan Earthquake and huge tsunami on glycaemic control and blood pressure in patients with diabetes mellitus
Source: PubMed Central journal article supplement — BMJ Open. 2012 Apr 13;2(2):e000830. doi: 10.1136/bmjopen-2012-000830 (PMC3332258; doi:10.1136/bmjopen-2012-000830), 2012-04-13

## Supplementary figure 5 (S5)

This photo shows the temporary clinic that was opened shortly after the earthquake. It was set up inside the Yonezaki Community Center, which miraculously escaped tsunami damage. The layout is extremely simple, with foldable chairs and tables only. Outpatient treatment was provided amid a series of large-scale aftershocks. (A) Since the building was originally constructed as a community center, it had some shortcomings as a medical facility. The examination rooms were dark and cramped. (B) Nevertheless, many patients came to this makeshift clinic.

A

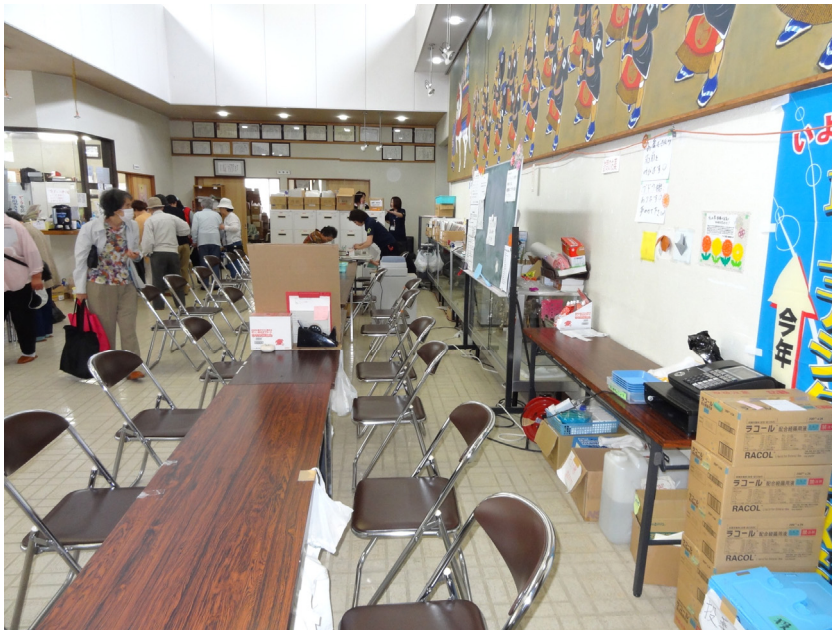

B

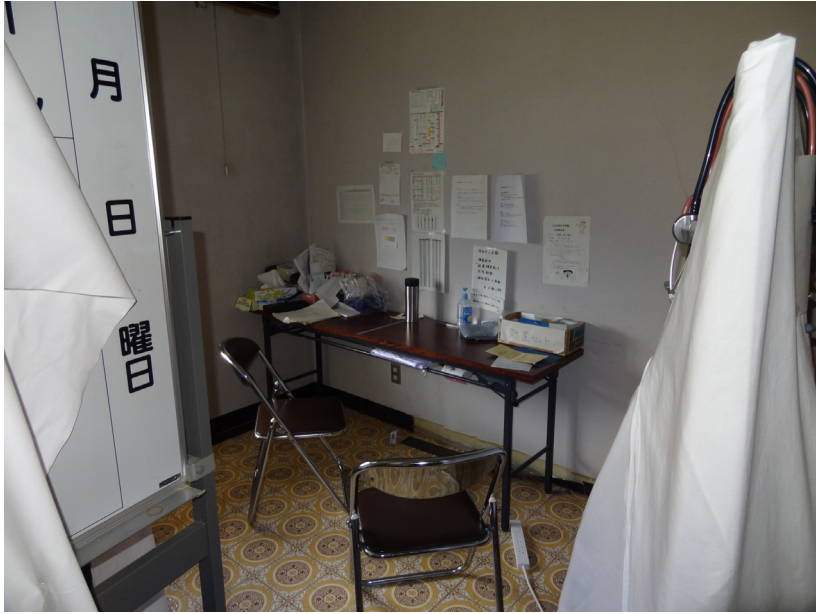

Supplement: bmjopen-2012-000830-s5.pdf [file bmjopen-2012-000830-s5.pdf]
