# Supplementary material for: Effects of the Great East Japan Earthquake and huge tsunami on glycaemic control and blood pressure in patients with diabetes mellitus
Source: PubMed Central journal article supplement — BMJ Open. 2012 Apr 13;2(2):e000830. doi: 10.1136/bmjopen-2012-000830 (PMC3332258; doi:10.1136/bmjopen-2012-000830), 2012-04-13
Supplement: bmjopen-2012-000830-s6.pdf [file bmjopen-2012-000830-s6.pdf]

### Supplementary figure 6 (S6)

This figure compares the changes which occurred in the levels of blood glucose (BG), glycated hemoglobin A1c (HbA1c), systolic blood pressure (SBP), and diastolic blood pressure (DBP), as measured before and after the earthquake. The changes are expressed as absolute values (“change”) and percentage values (“% change”), and the values for the Tsunami (-) and Tsunami (+) groups are compared. All parameters demonstrated significantly greater changes (including % changes) in the Tsunami (+) group than in the Tsunami (-) group. It is clear that in the aftermath of the earthquake, these 4 parameters rose far more dramatically in the Tsunami (+) group than in the Tsunami (-) group. The comparisons of the changes and of the percentage changes in each parameter were carried out by ANOVA and by a  $\chi^2$  test, respectively.

Supplementary figure 6 (S6)

| Tsunami           |         | (-)  |       | (+)  |        | p      |
|-------------------|---------|------|-------|------|--------|--------|
| Change in BG      | (mg/dL) | 9.1  | ± 5.7 | 44.6 | ± 14.1 | < 0.01 |
| % change in BG    | (%)     | 9.3  | ± 5.9 | 51.9 | ± 16.7 | < 0.01 |
| Change in HbA1c   | (%)     | 0.3  | ± 0.1 | 1.1  | ± 0.2  | < 0.01 |
| % change in HbA1c | (%)     | 4.6  | ± 1.8 | 17.3 | ± 3.2  | < 0.01 |
| Change in SBP     | (mmHg)  | 11.7 | ± 3.7 | 19.5 | ± 2.8  | < 0.01 |
| % change in SBP   | (%)     | 9.6  | ± 3.0 | 15.9 | ± 2.3  | < 0.01 |
| Change in DBP     | (mmHg)  | 5.6  | ± 1.9 | 8.5  | ± 1.6  | < 0.01 |
| % change in DBP   | (%)     | 9.1  | ± 3.4 | 12.7 | ± 2.5  | < 0.01 |

BG; blood glucose, SBP; systolic blood pressure, DBP; diastolic blood pressure.

mean ± SEM
