# Supplementary material for: Effects of the Great East Japan Earthquake and huge tsunami on glycaemic control and blood pressure in patients with diabetes mellitus
Source: PubMed Central journal article supplement — BMJ Open. 2012 Apr 13;2(2):e000830. doi: 10.1136/bmjopen-2012-000830 (PMC3332258; doi:10.1136/bmjopen-2012-000830), 2012-04-13
Supplement: bmjopen-2012-000830-s7.pdf [file bmjopen-2012-000830-s7.pdf]

Supplementary figure 7 (S7)

This figure compares, by gender, the absolute changes (A) and percentage changes (%) in systolic blood pressure (SBP) and diastolic blood pressure (DBP) that occurred due to the earthquake. Women demonstrated major and significant absolute changes as well as % changes in both SBP and DBP. It is clear that blood pressure in women rose far more dramatically after the earthquake than in men.

Supplementary figure 7 (S7)

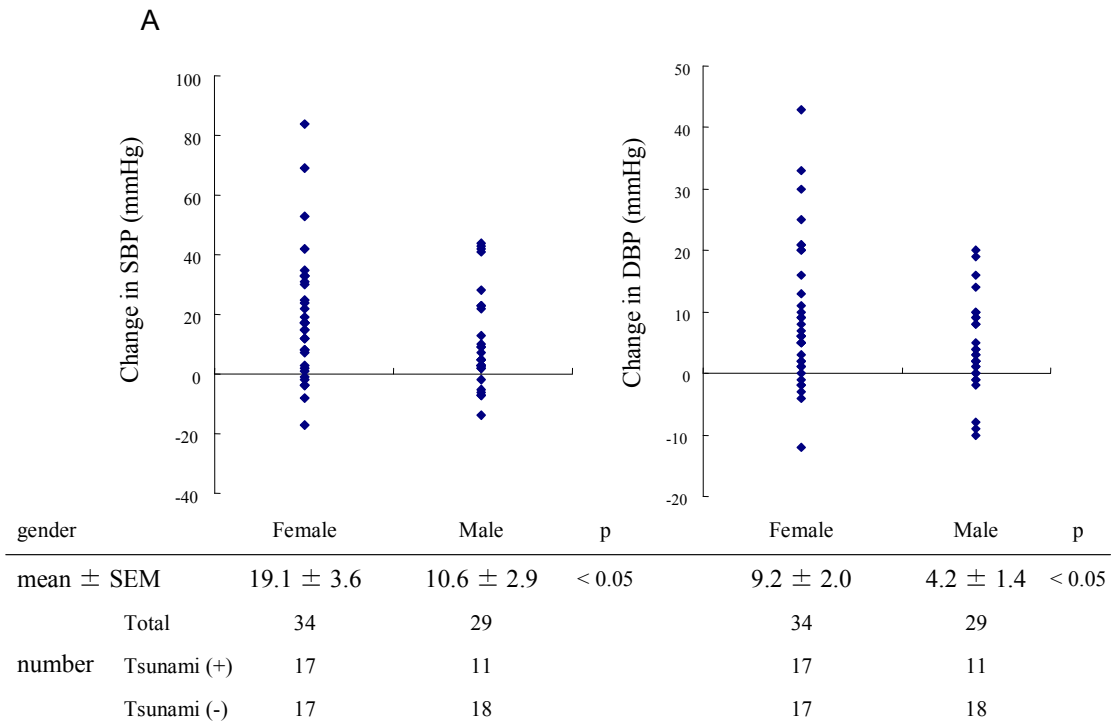

Supplementary figure 7 (S7)

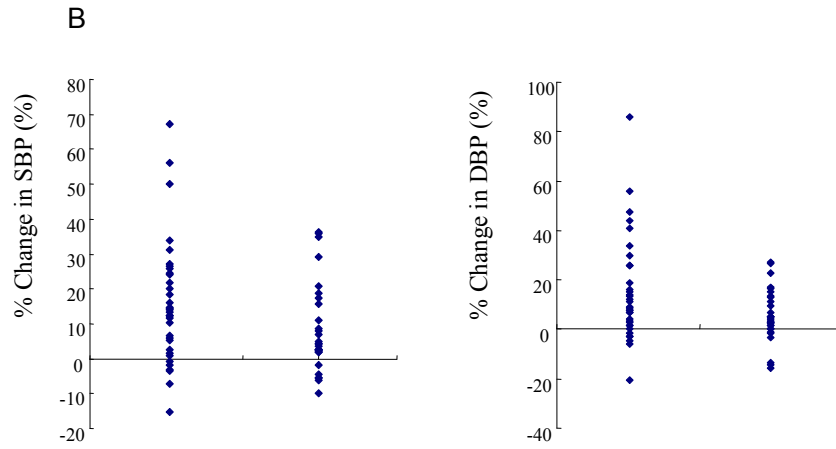

| gender         | Female         | Male          | p      | Female         | Male          | p      |
|----------------|----------------|---------------|--------|----------------|---------------|--------|
| mean $\pm$ SEM | 15.8 $\pm$ 3.0 | 8.4 $\pm$ 2.3 | < 0.05 | 15.0 $\pm$ 3.5 | 5.7 $\pm$ 2.0 | < 0.01 |
| number         |                |               |        |                |               |        |
| Total          | 34             | 29            |        | 34             | 29            |        |
| Tsunami (+)    | 17             | 11            |        | 17             | 11            |        |
| Tsunami (-)    | 17             | 18            |        | 17             | 18            |        |
